determine extent of amnesia with midazolam given immediately before general anaesthesia. *Br J Anaesth* 2005; 94:300-5

4. Thal GD, Szabo MD, Lopez-Bresnahan M, Crosby G: Exacerbation or unmasking of focal neurologic deficits by sedatives. *ANESTHESIOLOGY* 1996; 85:21-5

5. Joshi S, Wang M, Eto J, Nishanian EV: Comparison of intracarotid anesthetics for EEG silence. *J Neurosurg Anesthesiol* 2006; 18:112-8

(Accepted for publication January 7, 2009.)

Anesthesiology 2009; 110:1421

Copyright © 2009, the American Society of Anesthesiologists, Inc. Lippincott Williams & Wilkins, Inc.

## Electrical Nerve Stimulation and Subepineurial Staining: Not Only Mechanical Factors Count

*To the Editor:*—We read with interest the article published by Rigaud *et al.*<sup>1</sup> The authors addressed the very important and insufficiently explored relationship between the parameters of electrical nerve stimulation and the precise position of the stimulating needle tip. Unfortunately, little data exist defining this relationship in special clinical situations like neuromuscular and metabolic diseases, and we applaud the authors for their effort.

While acknowledging the factual results of this study, we disagree with the authors' interpretation of the findings regarding hyperglycemic dogs. Specifically, ink streaks under the epineurium were interpreted as needle penetration and intraneural injection. In our opinion, review of the photomicrographs (fig. 3 in the publication) does not necessarily support this conclusion. In these figures the amount of ink lodged under the epineurium appears negligible in comparison with that located outside the nerve, and the internal neural architecture remains intact.

It is possible that such marginal staining could have a biochemical rather than a mechanical explanation. In diabetes, an impairment in energy balance and tissue edema could result in a sufficient increase in epineurial permeability to allow some ink already in close contact to the nerve (as in fig. 2 in the publication) to penetrate the epineurium in the absence of any direct trauma. An alternative explanation could be migration of ink *via* dilated vasa nervorum. Eventually, performing

the same experiment with ultrasound-guided injection would be very interesting.

In the absence of clinical data suggesting frequent nerve damage from performing electrical guided nerve blocks on diabetic patients, one of two possible conclusions of this study should be considered: penetration of local anesthetic inside the epineurium (with or without needle penetration) does not result in nerve damage, or that the results of this study are pertinent only to this specific experimental condition and do not warrant clinical extrapolation.

The answer to this question has particular importance in the context of the ongoing debate about the relative risk of electrical stimulation-guided blocks in comparison with ultrasound guidance.

**Boris Yanovski, M.D.,\* Bruce Ben-David, M.D., Jacques E. Chelly, M.D., Ph.D., M.B.A.** \*University of Pittsburgh Medical Centers, Pittsburgh, Pennsylvania. yanovskib@upmc.edu

### Reference

1. Rigaud M, Filip P, Lirk P, Fuchs A, Gemes G, Hogan Q: Guidance of block needle insertion by electrical nerve stimulation: A pilot study of the resulting distribution of injected solution in dogs. *ANESTHESIOLOGY* 2008; 109:473-8

(Accepted for publication January 14, 2009.)

Anesthesiology 2009; 110:1421

Copyright © 2009, the American Society of Anesthesiologists, Inc. Lippincott Williams & Wilkins, Inc.

*In Reply:*—We thank Drs. Yanovski *et al.* for their interest in our paper.<sup>1</sup> They raise the point that there are alternative explanations for our observations of traces of ink within the sciatic nerves of hyperglycemic dogs other than our conclusion that the needle tip was positioned there during the ink injection. They argue that the accumulation of ink within the nerve is less than what was found outside the nerve, and ink penetration through the intact epineurium is a more likely explanation.

Publication necessarily degrades the images and limits their number, so not all of the relevant sections can be shown. The original high-resolution images (see figure 1, Supplemental Digital Content 1, <http://links.lww.com/A1219>; figure 2, Supplemental Digital Content 2, <http://links.lww.com/A1220>; figure 3, Supplemental Digital Content 3, <http://links.lww.com/A1212>) show clear dissection of ink among the fascicles of the nerves and travel of this ink as rivulets within the nerve to areas distant from the external accumulation in patterns not expected for direct diffusion. In other images, there is substantial destruction of the normal nerve anatomy at the injection site.

Finding the majority of the ink outside the nerve is compatible with our interpretation that injection was originally into the nerve, since the nerve is not capacious and the short path for retrograde flow along the outside of the needle shaft is not likely to be occluded by adjacent tissue pressure. Passage of the ink through membranous barriers is unlikely. The tissue was harvested immediately and frozen within 10

min, so limited time was available for such a process. Also, particulate ink such as was used for this study does not transit through membranes or vascular walls, and for this reason is routinely employed for vascular labeling.<sup>2</sup>

Bleeding seen within the nerves is clearly visible in the original photographs only in specimens showing intraneural ink (please see the supplemental digital content), which independent of ink distribution patterns conclusively indicates an intraneural needle placement. Overall, we believe the most likely explanation for these various observations is that needle insertion guided by electrical stimulation resulted in intraneural placement in the hyperglycemic dogs.

**Geza Gemes, M.D., Marcel Rigaud, M.D., Quinn Hogan, M.D.\*** \*Medical College of Wisconsin, Milwaukee, Wisconsin. qhogan@mcw.edu

### References

1. Rigaud M, Filip P, Lirk P, Fuchs A, Gemes G, Hogan Q: Guidance of block needle insertion by electrical nerve stimulation: A pilot study of the resulting distribution of injected solution in dogs. *ANESTHESIOLOGY* 2008; 109:473-8

2. Kachlik D, Baca V, Stingl J, Sosna B, Lametschwandtner A, Minnich B, Setina M: Architectonic arrangement of the vasa vasorum of the human great saphenous vein. *J Vasc Res* 2007; 44:157-66

(Accepted for publication January 14, 2009.)
